# Supplementary material for: Initial Identification of UDP-Glucose Dehydrogenase as a Prognostic Marker in Breast Cancer Patients, Which Facilitates Epirubicin Resistance and Regulates Hyaluronan Synthesis in MDA-MB-231 Cells
Source: PubMed Central journal article supplement (PMC7914570; doi:10.3390/biom11020246), 2021-02-09
Supplement: biomolecules-11-00246-s001.pdf [file biomolecules-11-00246-s001.pdf]

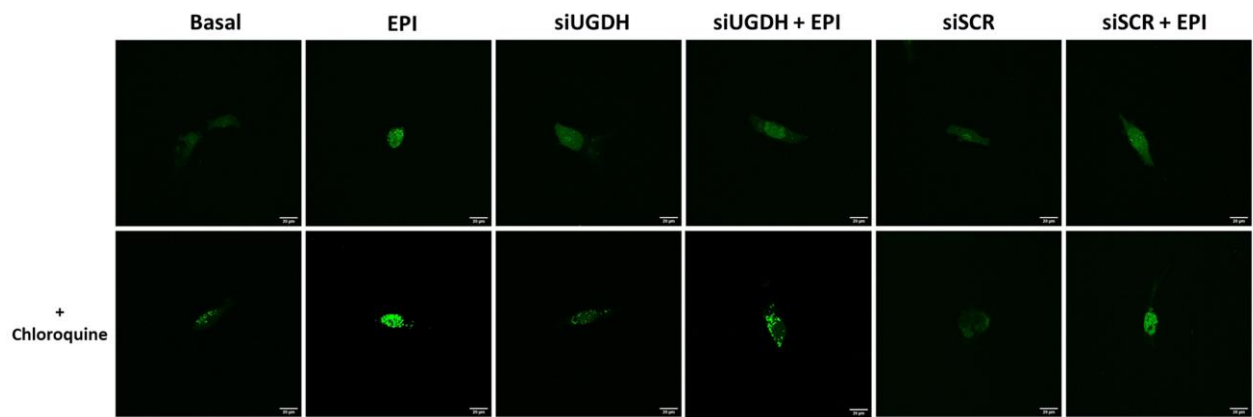

**Supplementary figure 1. Modulation of autophagy detected by confocal microscopy.** MDA-MB-231 cells were co-transfected with a specific siRNA against UGDH gene (siUGDH) or a random sequence siRNA as negative control (siSCR) and 2  $\mu$ g of a specific LC3-GFP construct. After 24h, 1  $\mu$ M EPI (EPI) was added to complete 48h of incubation. To analyze the formation of autophagosomes, the fluorescence emitted by GFP was evaluated through confocal microscopy adding chloroquine as a specific inhibitor of autophagy.
